# Supplementary material
Source: MDPI journal article supplement (https://www.mdpi.com/2813-2432/2/4/19)
Supplement: s1 [file s1]

**Table S1.** Age, education and location of 110 participants.

|                              | Frequency | Percent |
|------------------------------|-----------|---------|
| Age                          |           |         |
| 18-24                        | 15        | 13.6    |
| 25-34                        | 37        | 33.6    |
| 35-44                        | 26        | 23.6    |
| 45-54                        | 10        | 9.1     |
| 55-64                        | 13        | 11.8    |
| 65-74                        | 8         | 7.3     |
| 75 +                         | 1         | 0.9     |
| Education                    |           |         |
| No Education                 | 1         | 0.9     |
| Primary School               | 1         | 0.9     |
| High School                  | 22        | 20      |
| College/Undergraduate Degree | 63        | 57.3    |
| Postgraduate Degree          | 20        | 18.2    |
| Other                        | 3         | 2.7     |
| Town/City Size               |           |         |
| < 3,000 People               | 1         | 0.9     |
| 3,000-15,000                 | 9         | 8.2     |
| 15,000-100,000               | 22        | 20      |
| 100,000-1 Million            | 48        | 43.6    |
| 1 Million-10 Million         | 22        | 20      |
| 10 Million +                 | 8         | 7.3     |
| Total                        | 110       | 0       |

**Table S2.** Household size and annual household income of 110 participants.

|                               | Frequency | Percent |
|-------------------------------|-----------|---------|
| Household Size                |           |         |
| 1 Person                      | 43        | 39.1    |
| 2 Persons                     | 36        | 32.7    |
| 3 Persons                     | 18        | 16.4    |
| 4 Persons                     | 6         | 5.5     |
| 5 Persons                     | 6         | 5.5     |
| 6 Persons                     | 1         | 0.9     |
| Annual Household Income (JPY) |           |         |
| < 1.3 Million                 | 7         | 6.4     |
| 1.3 - 1.99 Million            | 1         | 0.9     |
| 2 - 2.99 Million              | 6         | 5.5     |
| 3 - 3.99 Million              | 22        | 20      |
| 4 - 4.99 Million              | 10        | 9.1     |

|                   |     |      |
|-------------------|-----|------|
| 5 - 5.99 Million  | 14  | 12.7 |
| 6 - 6.99 Million  | 5   | 4.5  |
| 7 - 8 Million     | 4   | 3.6  |
| 8 Million +       | 24  | 21.8 |
| Prefer not to say | 17  | 15.5 |
| Total             | 110 | 100  |

Note: By Sep. 2023, JPY 1,000,000  $\approx$  USD 6,800.

**Table S3.** Questionnaire sections, survey items, response measurement and source.

| Section                                                                                                   | Item Number and Description                                                                                            | Measurement          | Source                                                         |
|-----------------------------------------------------------------------------------------------------------|------------------------------------------------------------------------------------------------------------------------|----------------------|----------------------------------------------------------------|
| <b>Section 1: Participant Information Sheet</b>                                                           | 1: participant information sheet                                                                                       | n/a                  | n/a                                                            |
|                                                                                                           | definition and explanation of cell-based seafood                                                                       | n/a                  | BlueNalu [20]; Finless Foods [23]                              |
| <b>Section 2: Demographic and Socio-Economic Information</b>                                              | 2-9: age, residence country, town/city size, gender identity, education level, household size, annual household income | multiple choice      | adapted from Bryant et al. [62]                                |
| <b>Section 3: Seafood Consumption Habits</b>                                                              | 10-11: frequency and usual places of seafood consumption                                                               | multiple choice      | proposed by BlueNalu staff                                     |
|                                                                                                           | 12: purchase priorities                                                                                                | 4-point Likert scale |                                                                |
| <b>Section 4: Prior Knowledge, Feelings, Attitudes and Behavioral Intentions about Cell-Based Seafood</b> | 13: prior knowledge of cell-based seafood                                                                              | multiple choice      | adapted from Laestadius & Caldwell [61]; Verbeke et al. [48]   |
|                                                                                                           | 14: spontaneous feelings                                                                                               | 5-point Likert scale |                                                                |
|                                                                                                           | 15: interest in tasting                                                                                                | multiple choice      | proposed by BlueNalu staff and adapted from Bryant et al. [62] |
|                                                                                                           | 16: likeliness to buy cell-based seafood and replace all conventional seafood                                          | 5-point Likert scale |                                                                |
|                                                                                                           | 17: willingness to pay a higher price                                                                                  | multiple choice      |                                                                |

|                                                   |                                                                        |                      |                                                           |
|---------------------------------------------------|------------------------------------------------------------------------|----------------------|-----------------------------------------------------------|
|                                                   | 18: interest in buying different cell-based seafood species            | multiple choice      | proposed by BlueNalu staff                                |
|                                                   | 19: opinion on statements about traditional and modern food production | 5-point Likert scale | original items                                            |
|                                                   | 20: positive and negative terms to describe cell-based seafood         | multiple choice      | adapted from Verbeke et al. [48]; Franceković et al. [63] |
| <b>Section 5:<br/>Optional Final<br/>Comments</b> | 21: aspects that remain unclear                                        | free text            | original items                                            |
|                                                   | 22: prerequisites for consumption                                      |                      |                                                           |
|                                                   | 23: concerns about consumption                                         |                      |                                                           |

Note: For item 12, participants were asked to grade the importance of different purchase priorities (e.g., product quality and price) from ‘very important’ to ‘not at all important’ on a 4-point Likert scale. As offering a middle option such as ‘neither important nor unimportant’ was not considered sensible, this item was measured on a 4-point Likert scale instead of a 5-point Likert scale.

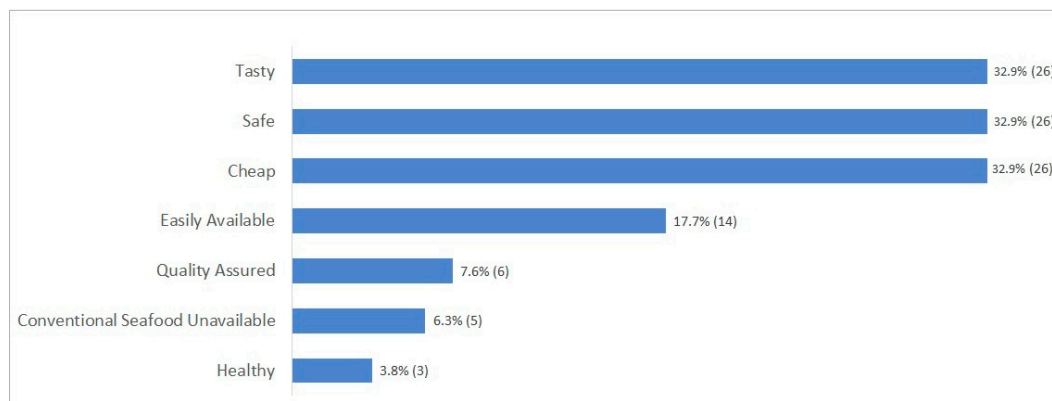

**Figure S1.** Prerequisites for cell-based seafood consumption among 79 Japanese consumers. Note: Combined percentages exceed 100%, as some respondents selected more than one prerequisite.
