# Supplementary material
Source: MDPI journal article supplement (https://www.mdpi.com/2813-2432/2/4/19)
Supplement: s1 [file s1]

## 新鮮な培養のお刺身はいかがですか？培養シーフードに対する日本の消費者の意識調査

### 参加者案内シート

このアンケートは、日本人で、なおかつ 18 歳以上の方が対象です。

アンケートへの回答には約 10 分かかります。

ギフト抽選に参加出来ます。景品は 3,000 円分の Amazon Japan ギフト券です。

動物福祉科学、倫理学、法学修士論文、2022 年、パウリーネ・ブラウン  
ウィンチェスター大学

メールアドレス：p.braun.19@unimail.winchester.ac.uk

電話：+49 152 36935314

スーパーバイザー：アンドリュー・ナイト教授

本研究の目的は、培養シーフードや魚に関する日本の消費者の知識や意識を考察することです。培養の魚は、大量の魚を捕獲、飼育、屠殺する必要なく、魚の細胞から成長させた本物の魚の組織です。生産過程を示す図 1 をご覧ください。生きている魚から細胞を抽出し(1)、栄養溶液に入れ(2)、そこで魚の組織へと成長させます(3)。これは本物の魚の組織と同じであり、人間が食べることができるものです(4)。

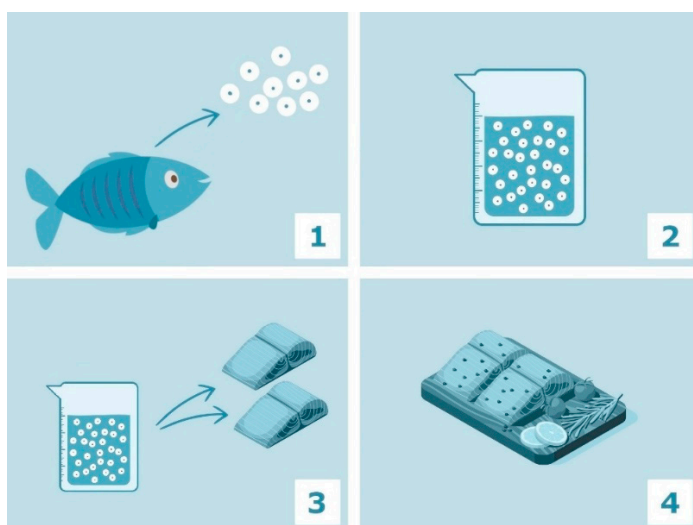

図 1 培養シーフードの生産過程の簡易描写© ウカシュ・シェリンスキ、ブルーナル  
ー (2021) より参照

現在はまだ開発中ですが、培養シーフード商品は比較的短期間で市場に出回る可能性があり、従来のシーフードに代わる有力な代替品となる可能性があります。

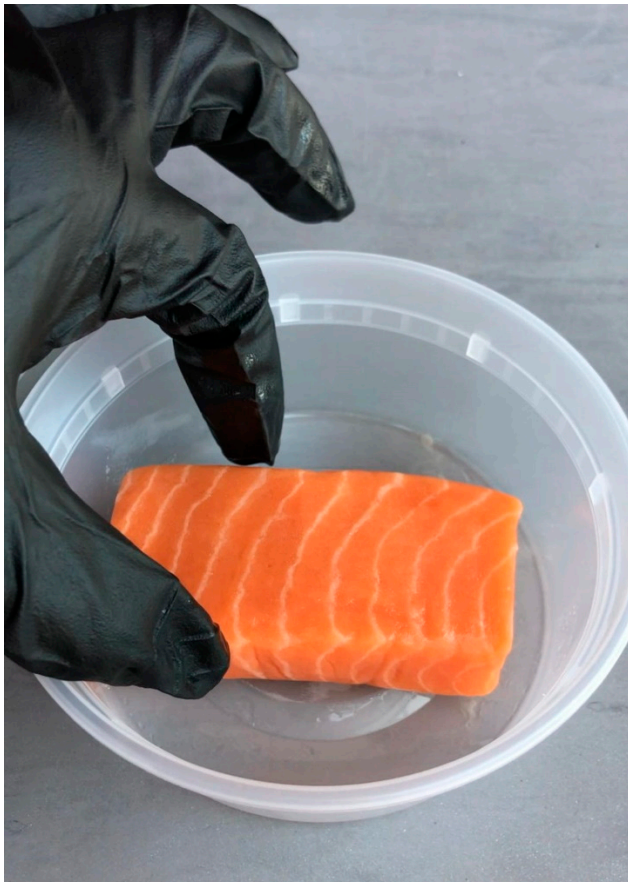

図 2 培養サーモン© アンナ・キープ

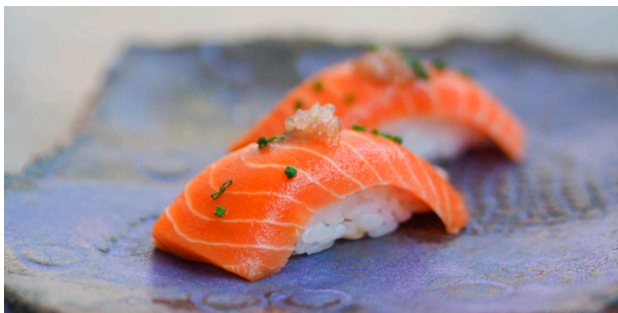

図 3 培養サーモンを使った寿司© ワイルドタイプ

なぜ代替品が必要なのでしょう？

従来の海産物の生産方法は、深刻な環境問題や動物福祉の懸案問題をもたらしています。養殖漁業も天然魚の漁獲による問題について少なからず対処することができますが、それ自身も克服すべき課題を抱えています。例えば、高い水準の動物福祉を確保した飼育環境を整え

ることや、必要以上の抗生剤を使用しない一方で、天然魚由来の油や魚肉を含まない餌を十分に与えることなどです。

従来の海産物の生産方法の問題を解決するために、細胞を利用した代替商品の開発が有望視されており、世界規模での「ゲームチェンジャー」となることもあり得ます。これらの代替商品が市場シェアを獲得できるかどうかは、消費者に受け入れられるかどうかにより大きく依存することになります。そのため、日本のようなシーフードの消費量が多い国では、消費者の意識がますます興味深い研究分野になります。

私の研究プロジェクトの一環として、培養シーフードに関する知識と意識について質問させていただきます。アンケートは、オンラインで回答となります。あなたの回答は、強力なパスワードで私のパソコンに保存され、外部に漏れることはありません。データの分析、論文の採点、集計結果の公表が終了した時点で、すべてのデータを削除します。

アンケートには匿名で回答していただき、個人を特定するデータを求められることはありません。この研究は、修士論文のために作成し、一般に公開される論文となる可能性もあります。このプロジェクトに関するお問い合わせは、上記のメールアドレスまでご連絡ください。この研究への貴重なご協力をいただくことに感謝いたします。

パウリーネ・ブラウン

**参加者案内シートお読みいただきましたか？このまま続けてもよろしいですか？**

- はい

**あなたの年齢について回答してください。**

- 18 歳未満 (→)
- 18 歳 ~ 24 歳
- 25 歳 ~ 34 歳
- 35 歳 ~ 44 歳
- 45 歳 ~ 54 歳
- 55 歳 ~ 64 歳
- 65 歳 ~ 74 歳
- 75 歳以上

➡ 申し訳ございません、このアンケートには参加できません」日本人で、なおかつ成人の方のみを対象とした意識調査となります。ありがとうございました！素敵な一日となりますように！

あなたの国籍について回答してください。

- 日本
- その他 ➡

➡ 申し訳ございません、このアンケートには参加できません」日本人で、なおかつ成人の方のみを対象とした意識調査となります。ありがとうございました！素敵な一日となりますように！

現在、お住まいの国について回答してください。

- 日本
- その他 ➡

➡ 「その他」を選んだ場合、国名をご記入ください。

お住まいの町/市の人口は何人ですか？

- 3,000 人以下
- 3,000 から約 15,000 人
- 15,000 人から約 10 万人
- 10 万人から約 100 万人
- 100 万人から約 1,000 万人
- 1,000 万人以上

あなたの性別について回答してください。

- 男性
- 女性
- その他
- 答えたくない

あなたの最終学歴について回答してください。

- 学歴なし
- 小・中学校

- 高校
- 大学 / 学部卒
- 大学院学位
- その他
- 答えたくない

**あなたの世帯人数は何人ですか？**

- 1人暮らし
- 2人
- 3人
- 4人
- 5人
- 6人
- 6人以上

**あなたの世帯年収（日本円）について回答してください。**

- 130万円未満
- 130万～199万円
- 200万～299万円
- 300万～399万円
- 400万～499万円
- 500万～599万円
- 600万～699万円
- 700万～800万円
- 800万円以上
- 答えたくない

**あなたが魚介類を食べる頻度について回答してください。**

- 1日に数回
- 1日に1回
- 週に4～6回
- 週に2～3回

- 週に 1 回
- 時々
- ほとんどなし
- 全くなし →

→ なぜためですか？

- アレルギーがあります
- 味が好きではありません
- ビーガンです
- その他

あなたは普段、魚介類を食べる場所はどこですか？（該当するものすべてにチェック）

- レストランで
- 自宅で、ご自身または家族が用意
- 自宅で、スーパーの調理済みの食品
- 自宅で、レストランのテイクアウト
- その他 →

→ 「その他」を選んだ場合、国名をご記入ください。

魚介類を購入する際の優先順位について回答してください。以下の点は、あなたにとってどの程度重要ですか？

|        | とても重要 | ある程度重要 | 少し重要 | まったく重要ではない |
|--------|-------|--------|------|------------|
| 品質     |       |        |      |            |
| 価格     |       |        |      |            |
| 産地     |       |        |      |            |
| 魚介類の種類 |       |        |      |            |

このアンケートを実施する以前に、培養シーフードについて聞いたことはありましたか？

- はい
- いいえ
- どちらともいえない

培養シーフードを食べることに対して、あなたが自然に感じることを、以下の各項目でどの程度が選択してください。

|       | まったくない | 少しある | ある程度ある | とてもある | 非常にある |
|-------|--------|------|--------|-------|-------|
| ワクワク感 |        |      |        |       |       |
| 期待感   |        |      |        |       |       |
| 嫌悪感   |        |      |        |       |       |
| 興味    |        |      |        |       |       |
| 不安    |        |      |        |       |       |

培養シーフードを試してみたいですか？

- はい
- いいえ
- わからない

あなたは、次のことを行う可能性はどの程度ありますか？

|                                         | 可能性は非常に高い | 可能性はある | どちらとも言えない | 可能性は低い | 可能性は極めて低い |
|-----------------------------------------|-----------|--------|-----------|--------|-----------|
| スーパーで売っていたら、あなたは培養シーフードを定期的に購入すると思いますか？ |           |        |           |        |           |

|                                    |  |  |  |  |  |
|------------------------------------|--|--|--|--|--|
| 従来のシーフード商品をすべて、培養シーフードの商品に置き換えますか？ |  |  |  |  |  |
|------------------------------------|--|--|--|--|--|

あなたは、従来のシーフードよりも培養シーフードの方に高い金額を払ってもいいと思いますか？

- はい ➡
- いいえ

➡ 培養シーフードに高い金額を払うとしたら、それはどの程度までですか？

- 従来のシーフードよりかなり高い
- 従来のシーフードよりやや高い
- 従来のシーフードより少し高い

あなたが購入したいと思う培養シーフードの商品はどれですか？(該当するものすべてにチェック)

- サーモン[鮭]
- 本マグロ[鮪]
- アジ [ 鰯 ]
- うなぎ[鰻]
- タイ[鯛]
- さんま[秋刀魚]
- カツオ[鰹]
- カンパチ[鰺]
- ホタテ[帆立貝]
- タコ / イカ[蛸 / 烏賊]
- エビ / クルマエビ [海老]
- ゼブラフィッシュ[インド原産のコイ科の熱帯淡水魚]
- その他 ➡

➡ 「その他」を選んだ場合、詳細をご記入ください。



あなたは以下の記述にどの程度同意しますか、または同意しませんか？

|                                                   | まったくそ<br>う思わない | 同意しない | どちらとも言<br>えない | 同意<br>する | 強く同<br>意する |
|---------------------------------------------------|----------------|-------|---------------|----------|------------|
| 「たとえ現在の食生活をそれに合わせ適合させる必要があったとしても、食品開発の進歩は良いことである」 |                |       |               |          |            |
| 「海と海洋生物は、尊敬と配慮をもって扱われるべき資源である」                    |                |       |               |          |            |
| 「伝統や料理の文化遺産は、より持続可能な食品生産方法の開発よりも重要である」            |                |       |               |          |            |

あなたにとって、培養シーフードの開発はどのような表現が当てはまりますか？(該当するものすべてにチェック)

- 不自然
- 必要
- 奇妙
- 道徳的
- 薄気味悪い
- 前途有望
- 不必要
- 未来志向
- 有害
- 興味深い
- 不道徳
- 有益
- その他 ☐

☐ 「その他」を選んだ場合、詳細をご記入ください。

最後に一言

培養シーフードについてご不明な点がありますか？具体的に記してください。

次の文章のうち、どれかひとつを完成させてください。

培養シーフードを食べてみようと思う、もし...

培養シーフードを食べない、なぜなら...

アンケートにご協力いただき、ありがとうございました。

本調査は、培養シーフードに関する人々の知識と意識を調査することを目的としています。

具体的には、このような「細胞」を使った商品を、将来的に、消費者が購入することが期待できるかどうかを知りたいと考えました。

ご協力に感謝します。本調査の結果にご興味をお持ちの方、あるいはご不明な点がある方は、「連絡を希望する」の欄にチェックを入れてください。その後、メールアドレスの入力をお願いします。

ありがとうございました！

パウリーネ・ブラウン

- 連絡を希望する
- ギフト抽選に参加する（景品は 3,000 円分の Amazon Japan ギフト券です）➡
- 上記の両方 ➡

➡ メールアドレスの入力をお願いします。

ありがとうございました！これで、ブラウザーのウィンドウを閉じてください。

著作表示

図 1 培養シーフードの生産過程の簡易描写© ウカシュ・シェリンスキ. ブルーナル  
ー (2021) より参照

BlueNalu (2021). *Cell-cultured seafood to feed the world. A solution to the increasing need for sustainable seafood.*

<https://de.freepik.com/vektoren/wasser>">Wasser Vektor erstellt von freepik - de.freepik.com

<https://de.freepik.com/vektoren/abstrakt>">Abstrakt Vektor erstellt von starline - de.freepik.com

<https://de.freepik.com/vektoren/design>">Design Vektor erstellt von macrovector -  
de.freepik.com

<https://de.freepik.com/vektoren/lebensmittel>">Lebensmittel Vektor erstellt von macrovector -  
de.freepik.com

## **図 2 培養サーモン© アンナ・ キープ**

[https://www.businessinsider.com/wildtype-cultivated-cell-grown-salmon-looks-feels-tastes-  
real-2021-10](https://www.businessinsider.com/wildtype-cultivated-cell-grown-salmon-looks-feels-tastes-real-2021-10)

<https://www.lifesalternateroute.com>

## **図 3 培養サーモンを使った寿司© ワイルドタイプ**

[https://www.businessinsider.com/wildtype-cultivated-cell-grown-salmon-looks-feels-tastes-  
real-2021-10](https://www.businessinsider.com/wildtype-cultivated-cell-grown-salmon-looks-feels-tastes-real-2021-10)
